# Supplementary material for: Structural variety of zinc and copper complexes based on a 2,3-disubstituted 1,2,3,4-tetrahydroquinazoline ligand
Source: Royal Society of Chemistry journal article supplement (doi:10.1039/c2dt30550j), 2012-01-01
Supplement: c2dt30550j.pdf [file c2dt30550j.pdf]

Supporting information for:

## Structural Variety of Zinc and Copper Complexes Based on a 2,3-Disubstituted 1,2,3,4-Tetrahydroquinazoline Ligand

Jesús Sanmartín-Matalobos,\* Cristina Portela-García, Luis Martínez-Rodríguez,  
Concepción González-Bello,\* Emilio Lence, Ana M. García-Deibe and Matilde Fondo

[jesus.sanmartin@usc.es](mailto:jesus.sanmartin@usc.es)

---

### Table of Contents:

|    |                                                                                                |    |
|----|------------------------------------------------------------------------------------------------|----|
| 1. | COSY spectrum of $Zn_2(L^{chain})_2 \cdot 2MeOH$ .....                                         | S2 |
| 2. | 1D NOE spectra of $Zn_2(L^{chain})_2 \cdot 2MeOH$ .....                                        | S3 |
| 3. | $^1H$ NMR spectra corresponding to the reactions between $H_2L^{ring}$ and $Zn(OAc)_2$ .....   | S4 |
| 4. | Energy for the most stable isomers of mononuclear zinc complexes .....                         | S5 |
| 5. | Comparison of the solvent effect in the relative stability of mononuclear zinc complexes ..... | S6 |
| 6. | Gibbs free energy for the most stable conformers of $Zn_2(L^{chain})_2$ .....                  | S7 |
| 7. | Energy details and coordinates for all the compounds studied.....                              | S8 |

---

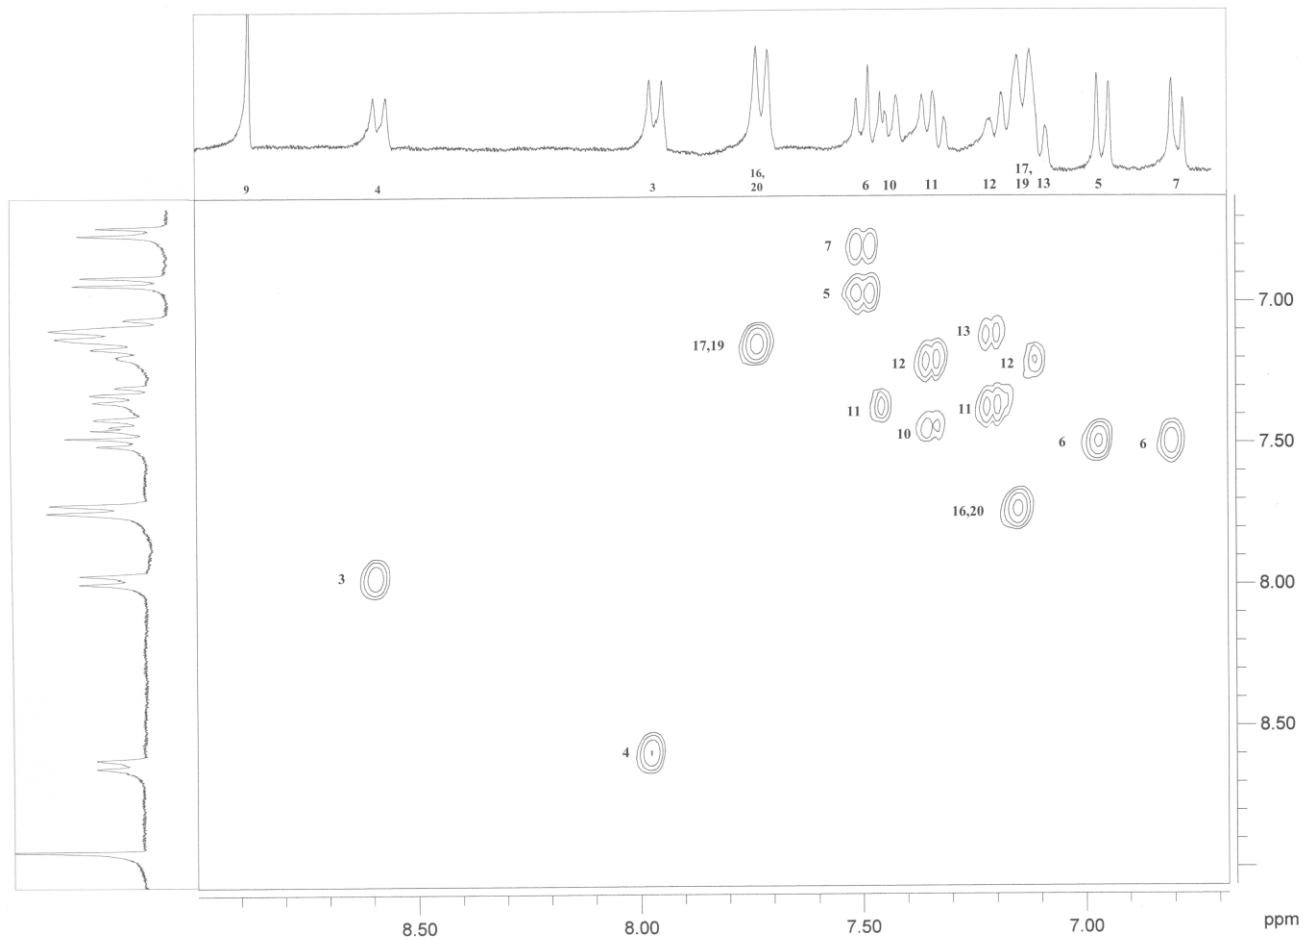

**Fig. S1.** Section of the COSY spectrum of  $Zn_2(L^{\text{chain}})_2 \cdot 2MeOH$ . Inset shows the numbering scheme of  $L^{\text{chain}}$  for the proton signals.

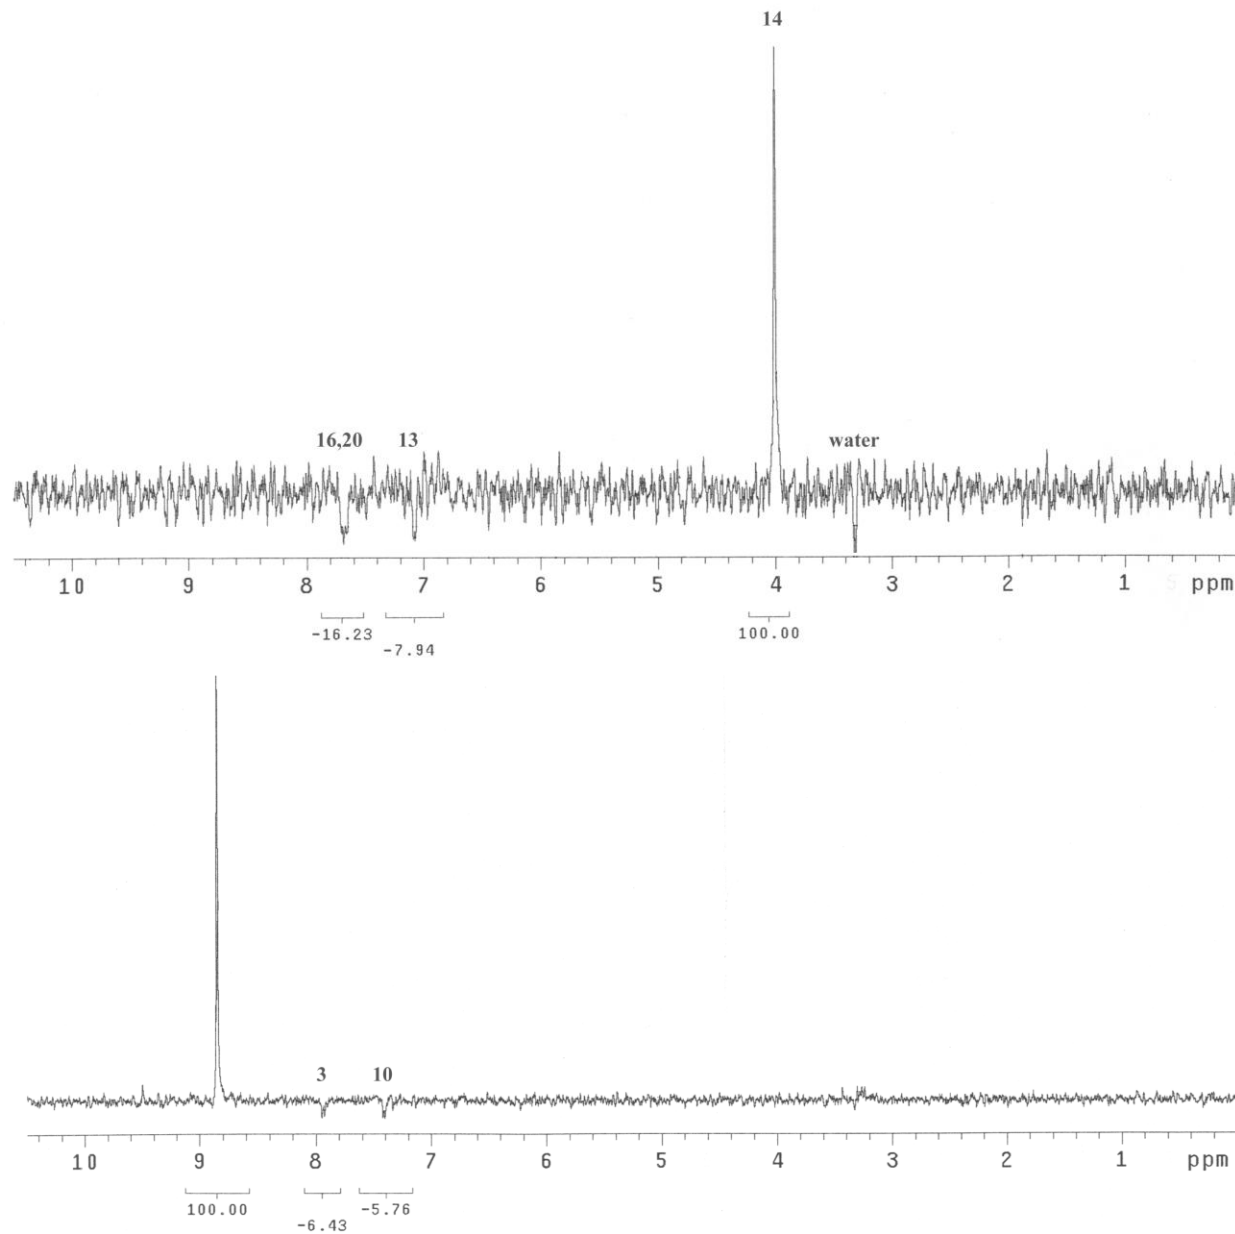

**Fig.S2.** 1D NOE spectra of  $Zn_2(L^{chain})_2 \cdot 2MeOH$  at 298 K obtained after inversion of the imine proton H-9 (*bottom*) and the methylene protons H-14 (*top*). Inset shows the numbering scheme of  $L^{chain}$  for the proton signals.

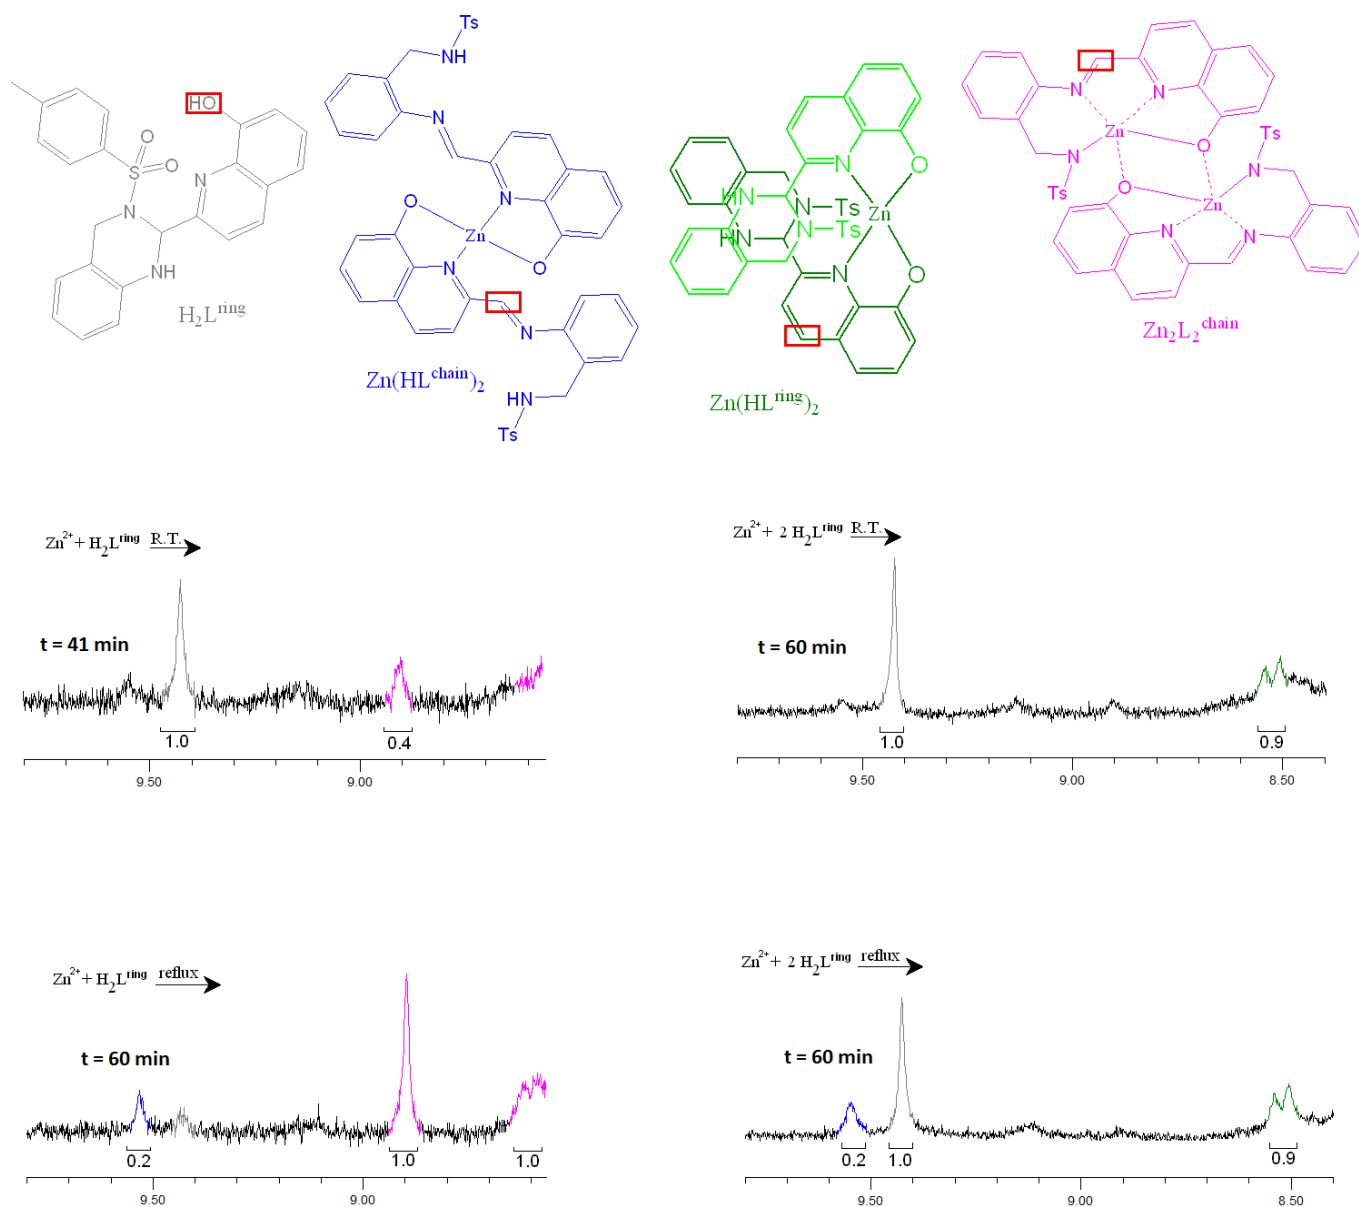

**Fig. S3.** Sections of the <sup>1</sup>H NMR spectra in *dms**o*-*d*<sub>6</sub> (8.4–9.8 ppm) corresponding to the reactions at reflux/room temperature between  $H_2L^{ring}$  and  $Zn(OAc)_2$  in a 1:1/2:1 molar ratios. The proton signals of each species that the figure is showing are marked by a red rectangle in the upper scheme.

**Table S1.** Energy (Hartrees)/Relative stability (kcal.mol<sup>-1</sup>) for the most stable isomers of mononuclear complexes with tetrahedral geometry calculated at DFT/M06 level and represented as sticks.

| Zn(II) complexes                                                                                                                             | in vacuum<br>Energy/Relative Stability | in methanol<br>Energy/Relative Stability |
|----------------------------------------------------------------------------------------------------------------------------------------------|----------------------------------------|------------------------------------------|
| 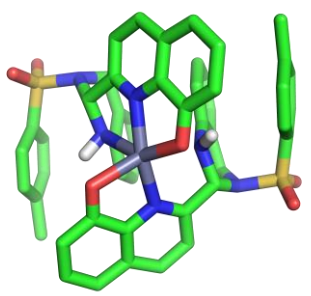<br><b>(<i>R,R</i>)-Zn(HL<sup>ring</sup>)<sub>2</sub></b>   | -3493,08110509 / 0                     | -3493,08168124 / 0                       |
| <br><b>(<i>R,S</i>)-Zn(HL<sup>ring</sup>)<sub>2</sub></b>  | -3493,04610843 / 4,00                  | -3493,08019334 / 0,93                    |
| <br><b>(<i>S,S</i>)-Zn(HL<sup>ring</sup>)<sub>2</sub></b> | -3493,03710651 / 9,65                  | -3493,07248906 / 5,77                    |
| <br><b>Zn(HL<sup>chain</sup>)<sub>2</sub></b>             | -3493,01690509 / 22,33                 | -3493,05288133 / 18,07                   |

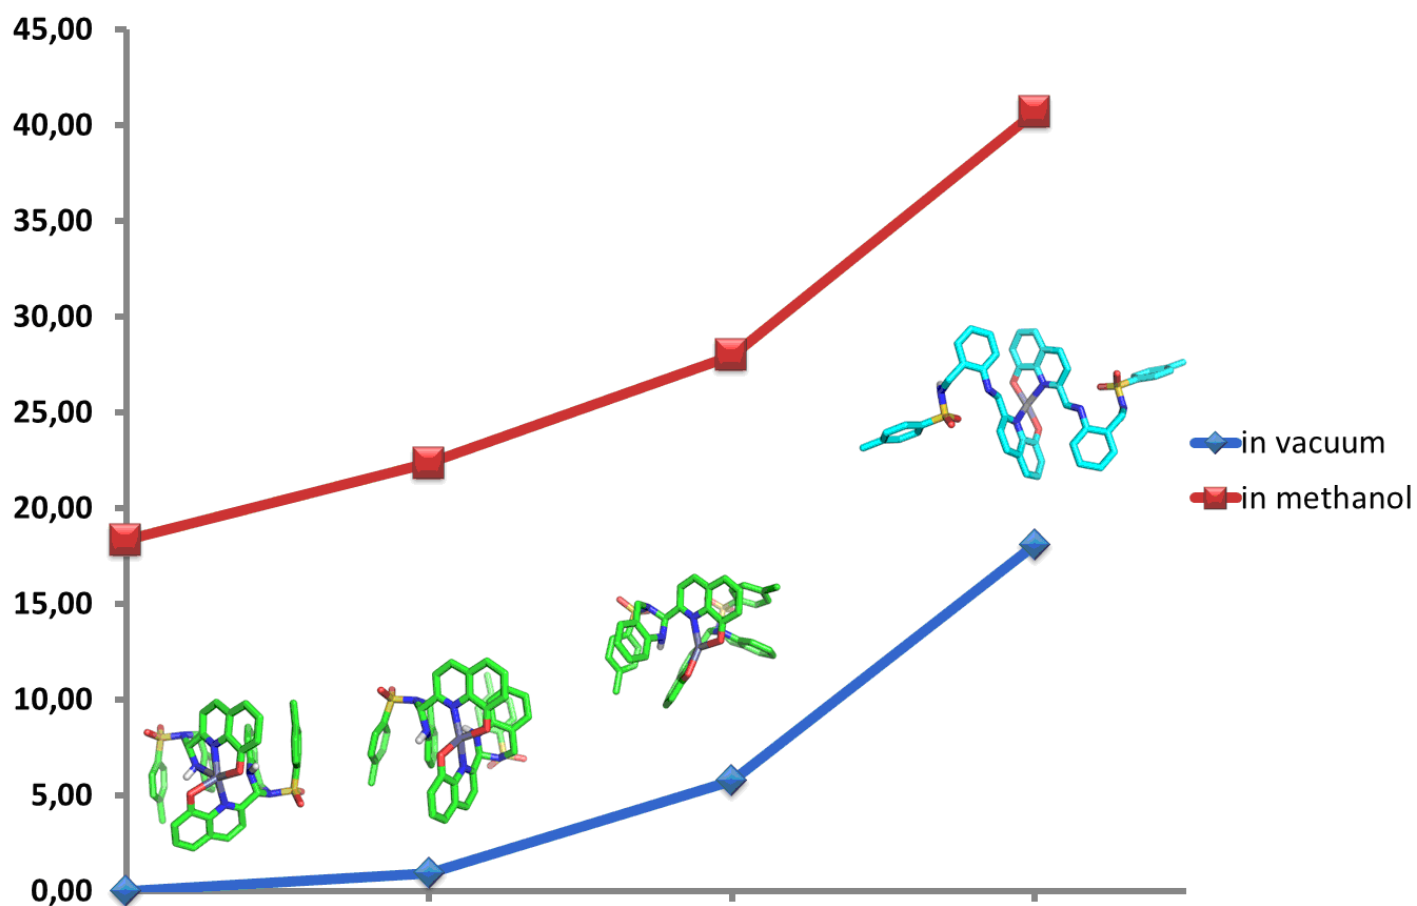

**Figure S4.** Comparison of the solvent effect in the relative stability of tetrahedral Zn(II) complexes calculated at DFT/M06 level in vacuum and methanol. The complexes represented (from left to right) are  $(R,R)\text{-Zn}(\text{HL}^{\text{ring}})_2$ ,  $(R,S)\text{-Zn}(\text{HL}^{\text{ring}})_2$ ,  $(S,S)\text{-Zn}(\text{HL}^{\text{ring}})_2$  and  $\text{Zn}(\text{HL}^{\text{chain}})_2$ .

**Table S2.** Gibbs free energy (Hartrees) for the most stable conformers of  $Zn_2(L^{chain})_2$  calculated at DFT/M06 level in methanol and represented as sticks. Relative stability to the most stable complex of all series is included. Two *N*-bridged complexes (**N1–N2**) and two *O*-bridged compounds (**O1–O2**) were studied.

| <i>N</i> -bridged                                                                                | G (Hartree)  | Relative G (kcal.mol <sup>-1</sup> ) |
|--------------------------------------------------------------------------------------------------|--------------|--------------------------------------|
| 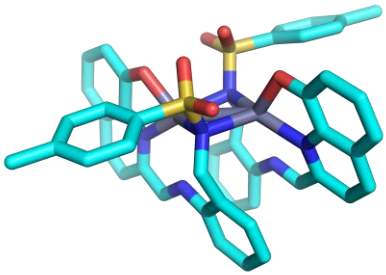<br><b>N1</b>   | -3556,696311 | 16,24                                |
| <br><b>N2</b>  | -3556,703228 | 11,90                                |
| <i>O</i> -bridged                                                                                |              |                                      |
| <br><b>O1</b> | -3556,722190 | 0,00                                 |
| <br><b>O2</b> | -3556,715099 | 4,45                                 |

Energy details and coordinates for all the compounds studied:

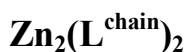

|                                              |                             |
|----------------------------------------------|-----------------------------|
| Zero-point correction=                       | 0.772779 (Hartree/Particle) |
| Thermal correction to Energy=                | 0.827059                    |
| Thermal correction to Enthalpy=              | 0.828003                    |
| Thermal correction to Gibbs Free Energy=     | 0.685286                    |
| Sum of electronic and zero-point Energies=   | -3556.634697                |
| Sum of electronic and thermal Energies=      | -3556.580416                |
| Sum of electronic and thermal Enthalpies=    | -3556.579472                |
| Sum of electronic and thermal Free Energies= | -3556.722190                |

| Center Number | Atomic Number | Atomic Type | Coordinates (Angstroms) |           |           |
|---------------|---------------|-------------|-------------------------|-----------|-----------|
|               |               |             | X                       | Y         | Z         |
| 1             | 6             | 0           | 6.226191                | 0.717407  | -1.240962 |
| 2             | 6             | 0           | 5.033597                | 1.437788  | -1.287321 |
| 3             | 6             | 0           | 4.690161                | 2.299537  | -0.249612 |
| 4             | 6             | 0           | 5.541935                | 2.429447  | 0.842716  |
| 5             | 6             | 0           | 6.728088                | 1.695230  | 0.922979  |
| 6             | 6             | 0           | 7.059464                | 0.844277  | -0.137885 |
| 7             | 16            | 0           | 3.862672                | 1.125673  | -2.601498 |
| 8             | 8             | 0           | 2.972681                | 2.296158  | -2.637189 |
| 9             | 6             | 0           | 7.635022                | 1.819082  | 2.109634  |
| 10            | 7             | 0           | 2.951110                | -0.132625 | -2.176394 |
| 11            | 6             | 0           | 3.530885                | -1.466218 | -2.281562 |
| 12            | 6             | 0           | 4.463158                | -1.977405 | -1.194614 |
| 13            | 6             | 0           | 4.313775                | -1.728034 | 0.184443  |
| 14            | 6             | 0           | 5.139393                | -2.380931 | 1.109135  |
| 15            | 6             | 0           | 6.151811                | -3.228578 | 0.684857  |
| 16            | 6             | 0           | 6.348114                | -3.434684 | -0.677621 |
| 17            | 6             | 0           | 5.501839                | -2.820498 | -1.593793 |
| 18            | 7             | 0           | 3.332200                | -0.810189 | 0.602511  |
| 19            | 6             | 0           | 3.500820                | -0.098433 | 1.652153  |
| 20            | 6             | 0           | 2.508865                | 0.928802  | 1.988671  |
| 21            | 7             | 0           | 1.571214                | 1.131760  | 1.077756  |
| 22            | 6             | 0           | 0.642481                | 2.090177  | 1.228591  |
| 23            | 6             | 0           | 0.624090                | 2.935132  | 2.372857  |
| 24            | 6             | 0           | 1.633077                | 2.706510  | 3.338731  |
| 25            | 6             | 0           | 2.571827                | 1.715880  | 3.155773  |
| 26            | 6             | 0           | -0.374478               | 3.928684  | 2.462375  |
| 27            | 6             | 0           | -1.283626               | 4.054858  | 1.433970  |
| 28            | 6             | 0           | -1.258100               | 3.222191  | 0.294776  |
| 29            | 6             | 0           | -0.317147               | 2.213721  | 0.168206  |
| 30            | 30            | 0           | 1.560321                | 0.118634  | -0.756237 |



|    |    |   |           |           |           |
|----|----|---|-----------|-----------|-----------|
| 31 | 8  | 0 | -0.257693 | 1.354908  | -0.842297 |
| 32 | 30 | 0 | -1.528274 | -0.285895 | -0.672636 |
| 33 | 8  | 0 | 0.290821  | -1.505653 | -0.600847 |
| 34 | 6  | 0 | 0.389561  | -2.185948 | 0.535288  |
| 35 | 6  | 0 | -0.530534 | -1.882471 | 1.592800  |
| 36 | 6  | 0 | -0.474096 | -2.530086 | 2.858165  |
| 37 | 6  | 0 | 0.527348  | -3.501407 | 3.074412  |
| 38 | 6  | 0 | 1.396816  | -3.802463 | 2.048674  |
| 39 | 6  | 0 | 1.330827  | -3.168822 | 0.789260  |
| 40 | 7  | 0 | -1.468222 | -0.962364 | 1.314024  |
| 41 | 6  | 0 | -2.386657 | -0.622368 | 2.203855  |
| 42 | 6  | 0 | -2.410313 | -1.207838 | 3.485858  |
| 43 | 6  | 0 | -1.456081 | -2.148670 | 3.802527  |
| 44 | 6  | 0 | -3.401506 | 0.321586  | 1.725244  |
| 45 | 7  | 0 | -3.264930 | 0.854575  | 0.569353  |
| 46 | 6  | 0 | -4.271487 | 1.677093  | 0.029065  |
| 47 | 6  | 0 | -5.115380 | 2.434707  | 0.851939  |
| 48 | 6  | 0 | -6.136809 | 3.202557  | 0.312849  |
| 49 | 6  | 0 | -6.326047 | 3.221584  | -1.066043 |
| 50 | 6  | 0 | -5.470021 | 2.495122  | -1.886085 |
| 51 | 6  | 0 | -4.424363 | 1.726698  | -1.371903 |
| 52 | 6  | 0 | -3.486462 | 1.068391  | -2.370198 |
| 53 | 7  | 0 | -2.945085 | -0.255528 | -2.080706 |
| 54 | 16 | 0 | -3.890348 | -1.533043 | -2.330469 |
| 55 | 8  | 0 | -4.603288 | -1.425108 | -3.612786 |
| 56 | 6  | 0 | -5.150922 | -1.543894 | -1.068019 |
| 57 | 6  | 0 | -4.875764 | -2.120448 | 0.168133  |
| 58 | 6  | 0 | -5.813651 | -2.024708 | 1.190600  |
| 59 | 6  | 0 | -7.017514 | -1.340416 | 1.001538  |
| 60 | 6  | 0 | -7.270832 | -0.766049 | -0.249677 |
| 61 | 6  | 0 | -6.350957 | -0.868497 | -1.283210 |
| 62 | 6  | 0 | -8.023545 | -1.219022 | 2.105261  |
| 63 | 8  | 0 | -3.056551 | -2.721728 | -2.096398 |
| 64 | 8  | 0 | 4.663072  | 0.820598  | -3.797475 |
| 65 | 1  | 0 | -1.455666 | -2.621281 | 4.784028  |
| 66 | 1  | 0 | 1.661027  | 3.331663  | 4.230451  |
| 67 | 1  | 0 | -3.178600 | -0.917675 | 4.199293  |
| 68 | 1  | 0 | 3.357906  | 1.537370  | 3.886737  |
| 69 | 1  | 0 | 0.593596  | -4.003085 | 4.038020  |
| 70 | 1  | 0 | -0.410690 | 4.579083  | 3.334397  |
| 71 | 1  | 0 | 2.166898  | -4.556715 | 2.205039  |
| 72 | 1  | 0 | -2.056246 | 4.820079  | 1.496129  |
| 73 | 1  | 0 | 2.047105  | -3.428364 | 0.010559  |
| 74 | 1  | 0 | -2.003946 | 3.352695  | -0.488875 |
| 75 | 1  | 0 | -4.282620 | 0.477683  | 2.361972  |
| 76 | 1  | 0 | 4.392180  | -0.164418 | 2.290717  |
| 77 | 1  | 0 | -4.946876 | 2.443462  | 1.928073  |
| 78 | 1  | 0 | 4.961488  | -2.239783 | 2.174473  |
| 79 | 1  | 0 | -5.612750 | 2.521130  | -2.967008 |
| 80 | 1  | 0 | 5.646165  | -2.998163 | -2.660171 |
| 81 | 1  | 0 | -6.777855 | 3.789171  | 0.967884  |

|     |   |   |           |           |           |
|-----|---|---|-----------|-----------|-----------|
| 82  | 1 | 0 | 6.782736  | -3.728854 | 1.416705  |
| 83  | 1 | 0 | -7.129367 | 3.810810  | -1.503897 |
| 84  | 1 | 0 | 7.147471  | -4.085362 | -1.026735 |
| 85  | 1 | 0 | -3.985366 | 1.065338  | -3.352092 |
| 86  | 1 | 0 | 4.050122  | -1.569812 | -3.247089 |
| 87  | 1 | 0 | -2.608826 | 1.726045  | -2.485459 |
| 88  | 1 | 0 | 2.674548  | -2.158703 | -2.335787 |
| 89  | 1 | 0 | -3.933814 | -2.645991 | 0.322166  |
| 90  | 1 | 0 | 3.757094  | 2.859700  | -0.297125 |
| 91  | 1 | 0 | -6.550597 | -0.421725 | -2.255974 |
| 92  | 1 | 0 | 6.493406  | 0.056387  | -2.063986 |
| 93  | 1 | 0 | -5.605373 | -2.482059 | 2.158917  |
| 94  | 1 | 0 | 5.271275  | 3.099372  | 1.659911  |
| 95  | 1 | 0 | -8.206855 | -0.230120 | -0.411141 |
| 96  | 1 | 0 | 7.982660  | 0.265351  | -0.091913 |
| 97  | 1 | 0 | -8.971148 | -1.704026 | 1.834943  |
| 98  | 1 | 0 | 8.528431  | 2.411058  | 1.867079  |
| 99  | 1 | 0 | -7.663199 | -1.678525 | 3.032732  |
| 100 | 1 | 0 | 7.132079  | 2.310299  | 2.950980  |
| 101 | 1 | 0 | -8.255306 | -0.166188 | 2.315738  |
| 102 | 1 | 0 | 7.986816  | 0.835665  | 2.447103  |

-----

### Zn(HL<sup>ring</sup>)(HL<sup>chain</sup>)

Zero-point correction= 0.797081 (Hartree/Particle)  
Thermal correction to Energy= 0.849870  
Thermal correction to Enthalpy= 0.850814  
Thermal correction to Gibbs Free Energy= 0.713020  
Sum of electronic and zero-point Energies= -3492.257497  
Sum of electronic and thermal Energies= -3492.204708  
Sum of electronic and thermal Enthalpies= -3492.203764  
Sum of electronic and thermal Free Energies= -3492.341559

-----

| Center<br>Number | Atomic<br>Number | Atomic<br>Type | Coordinates (Angstroms) |           |           |
|------------------|------------------|----------------|-------------------------|-----------|-----------|
|                  |                  |                | X                       | Y         | Z         |
| 1                | 6                | 0              | 5.544285                | 0.222959  | -0.192884 |
| 2                | 6                | 0              | 5.431168                | 0.430538  | 1.180918  |
| 3                | 6                | 0              | 6.555253                | 0.455650  | 1.999238  |
| 4                | 6                | 0              | 7.809271                | 0.273974  | 1.427269  |
| 5                | 6                | 0              | 7.952304                | 0.061181  | 0.054471  |
| 6                | 6                | 0              | 6.802127                | 0.034956  | -0.743761 |
| 7                | 16               | 0              | 3.832853                | 0.631410  | 1.919994  |
| 8                | 8                | 0              | 2.992663                | 1.404098  | 1.001775  |
| 9                | 6                | 0              | 9.304325                | -0.123003 | -0.562789 |
| 10               | 7                | 0              | 3.225771                | -0.925298 | 2.031066  |

|    |    |   |           |           |           |
|----|----|---|-----------|-----------|-----------|
| 11 | 6  | 0 | 2.171484  | -1.355595 | 1.099350  |
| 12 | 6  | 0 | 2.682997  | -1.677069 | -0.275952 |
| 13 | 6  | 0 | 2.346892  | -0.904952 | -1.400339 |
| 14 | 6  | 0 | 2.898397  | -1.224431 | -2.648543 |
| 15 | 6  | 0 | 3.766498  | -2.299427 | -2.787061 |
| 16 | 6  | 0 | 4.097708  | -3.072644 | -1.677176 |
| 17 | 6  | 0 | 3.557214  | -2.752471 | -0.437866 |
| 18 | 7  | 0 | 1.418884  | 0.155238  | -1.322719 |
| 19 | 6  | 0 | 1.792574  | 1.316846  | -1.708704 |
| 20 | 6  | 0 | 0.815965  | 2.398739  | -1.841984 |
| 21 | 6  | 0 | 1.164850  | 3.746846  | -2.061067 |
| 22 | 6  | 0 | 0.160033  | 4.677531  | -2.194653 |
| 23 | 6  | 0 | -1.200159 | 4.289900  | -2.132064 |
| 24 | 6  | 0 | -1.449528 | 2.903392  | -1.916479 |
| 25 | 7  | 0 | -0.451714 | 2.022109  | -1.783075 |
| 26 | 6  | 0 | -2.299185 | 5.157365  | -2.282877 |
| 27 | 6  | 0 | -3.575568 | 4.628720  | -2.212308 |
| 28 | 6  | 0 | -3.830213 | 3.262606  | -2.000734 |
| 29 | 6  | 0 | -2.785670 | 2.346354  | -1.844442 |
| 30 | 8  | 0 | -2.930238 | 1.075649  | -1.646551 |
| 31 | 30 | 0 | -1.127333 | 0.099594  | -1.244963 |
| 32 | 8  | 0 | -0.918342 | -1.625196 | -2.332061 |
| 33 | 6  | 0 | -0.702461 | -2.659994 | -1.582153 |
| 34 | 6  | 0 | -0.817038 | -2.545398 | -0.142358 |
| 35 | 6  | 0 | -0.587962 | -3.640691 | 0.737456  |
| 36 | 6  | 0 | -0.238411 | -4.893287 | 0.189582  |
| 37 | 6  | 0 | -0.129830 | -5.006200 | -1.182810 |
| 38 | 6  | 0 | -0.350589 | -3.927414 | -2.057737 |
| 39 | 7  | 0 | -1.151978 | -1.328000 | 0.326120  |
| 40 | 6  | 0 | -1.306041 | -1.108603 | 1.618314  |
| 41 | 6  | 0 | -1.086272 | -2.122007 | 2.565816  |
| 42 | 6  | 0 | -0.726531 | -3.375301 | 2.120233  |
| 43 | 6  | 0 | -1.697773 | 0.308894  | 1.970595  |
| 44 | 7  | 0 | -3.075053 | 0.610181  | 1.536220  |
| 45 | 6  | 0 | -3.507161 | 2.027979  | 1.560195  |
| 46 | 6  | 0 | -2.361758 | 2.995876  | 1.524846  |
| 47 | 6  | 0 | -1.049549 | 2.561982  | 1.352600  |
| 48 | 7  | 0 | -0.814542 | 1.183684  | 1.202299  |
| 49 | 6  | 0 | -2.607563 | 4.364475  | 1.635749  |
| 50 | 6  | 0 | -1.570066 | 5.285083  | 1.558016  |
| 51 | 6  | 0 | -0.261353 | 4.835497  | 1.379876  |
| 52 | 6  | 0 | 0.003659  | 3.476699  | 1.291367  |
| 53 | 16 | 0 | -4.287867 | -0.456010 | 2.017704  |
| 54 | 8  | 0 | -4.004534 | -0.969661 | 3.359737  |
| 55 | 6  | 0 | -4.202704 | -1.798540 | 0.869244  |
| 56 | 6  | 0 | -4.117204 | -3.102824 | 1.339889  |
| 57 | 6  | 0 | -4.060365 | -4.144350 | 0.418621  |
| 58 | 6  | 0 | -4.088718 | -3.893489 | -0.953687 |
| 59 | 6  | 0 | -4.206303 | -2.568199 | -1.393921 |
| 60 | 6  | 0 | -4.267242 | -1.515784 | -0.494841 |
| 61 | 6  | 0 | -3.986680 | -5.011517 | -1.944951 |

|     |   |   |           |           |           |
|-----|---|---|-----------|-----------|-----------|
| 62  | 8 | 0 | -5.539669 | 0.262361  | 1.791727  |
| 63  | 8 | 0 | 4.024127  | 1.087902  | 3.294201  |
| 64  | 1 | 0 | 2.213542  | 4.032776  | -2.113754 |
| 65  | 1 | 0 | -4.854797 | 2.894260  | -1.959336 |
| 66  | 1 | 0 | -2.132815 | 6.220172  | -2.450063 |
| 67  | 1 | 0 | 0.401711  | 5.727437  | -2.359647 |
| 68  | 1 | 0 | -4.428486 | 5.297495  | -2.328521 |
| 69  | 1 | 0 | 2.836270  | 1.541365  | -1.971906 |
| 70  | 1 | 0 | 2.610301  | -0.629520 | -3.514637 |
| 71  | 1 | 0 | 4.179297  | -2.535404 | -3.766067 |
| 72  | 1 | 0 | 3.826409  | -3.337684 | 0.442326  |
| 73  | 1 | 0 | 4.773310  | -3.919440 | -1.776704 |
| 74  | 1 | 0 | 1.361975  | -0.619405 | 1.037058  |
| 75  | 1 | 0 | 1.755783  | -2.263100 | 1.555336  |
| 76  | 1 | 0 | 4.657093  | 0.195864  | -0.822896 |
| 77  | 1 | 0 | 6.447226  | 0.622037  | 3.068437  |
| 78  | 1 | 0 | 6.897268  | -0.136036 | -1.816358 |
| 79  | 1 | 0 | 8.695957  | 0.296188  | 2.059887  |
| 80  | 1 | 0 | 9.320855  | -0.992096 | -1.232596 |
| 81  | 1 | 0 | 9.582245  | 0.750801  | -1.167774 |
| 82  | 1 | 0 | 10.080101 | -0.261200 | 0.198636  |
| 83  | 1 | 0 | 3.001859  | -1.104911 | 3.009061  |
| 84  | 1 | 0 | -0.244724 | -4.064332 | -3.133428 |
| 85  | 1 | 0 | -0.057026 | -5.741185 | 0.847690  |
| 86  | 1 | 0 | -0.551259 | -4.181099 | 2.832942  |
| 87  | 1 | 0 | 0.142808  | -5.969598 | -1.613792 |
| 88  | 1 | 0 | 1.023268  | 3.105305  | 1.167821  |
| 89  | 1 | 0 | 0.559642  | 5.548308  | 1.320631  |
| 90  | 1 | 0 | -3.634769 | 4.705770  | 1.773408  |
| 91  | 1 | 0 | -1.779575 | 6.349981  | 1.635915  |
| 92  | 1 | 0 | -4.128282 | 2.239884  | 2.443778  |
| 93  | 1 | 0 | -4.143244 | 2.180157  | 0.675778  |
| 94  | 1 | 0 | -4.073745 | -3.297192 | 2.409297  |
| 95  | 1 | 0 | -4.295146 | -0.482093 | -0.842867 |
| 96  | 1 | 0 | -3.969382 | -5.170742 | 0.773951  |
| 97  | 1 | 0 | -4.222861 | -2.361529 | -2.464427 |
| 98  | 1 | 0 | -3.684392 | -5.948500 | -1.462411 |
| 99  | 1 | 0 | -4.946562 | -5.185831 | -2.450382 |
| 100 | 1 | 0 | -3.247659 | -4.778141 | -2.723338 |
| 101 | 1 | 0 | -1.591217 | 0.477433  | 3.058493  |
| 102 | 1 | 0 | -1.218720 | -1.909906 | 3.624410  |
| 103 | 1 | 0 | 0.163651  | 0.957791  | 1.384746  |

---

## Zn(HL<sup>chain</sup>)<sub>2</sub>

Zero-point correction= 0.794064 (Hartree/Particle)  
Thermal correction to Energy= 0.848239  
Thermal correction to Enthalpy= 0.849184

Thermal correction to Gibbs Free Energy= 0.706231  
Sum of electronic and zero-point Energies= -3492.255398  
Sum of electronic and thermal Energies= -3492.201222  
Sum of electronic and thermal Enthalpies= -3492.200278  
Sum of electronic and thermal Free Energies= -3492.343230

---

| Center<br>Number | Atomic<br>Number | Atomic<br>Type | Coordinates (Angstroms) |           |           |
|------------------|------------------|----------------|-------------------------|-----------|-----------|
|                  |                  |                | X                       | Y         | Z         |
| 1                | 6                | 0              | 3.567045                | -2.266297 | -2.568368 |
| 2                | 6                | 0              | 4.002244                | -1.411706 | -1.563959 |
| 3                | 6                | 0              | 5.192642                | -1.647114 | -0.877058 |
| 4                | 6                | 0              | 5.935344                | -2.774709 | -1.189372 |
| 5                | 6                | 0              | 5.507651                | -3.668601 | -2.179381 |
| 6                | 6                | 0              | 4.325156                | -3.391988 | -2.868285 |
| 7                | 16               | 0              | 3.049142                | 0.020792  | -1.151058 |
| 8                | 8                | 0              | 1.843045                | 0.021793  | -1.982263 |
| 9                | 6                | 0              | 6.288744                | -4.913102 | -2.469095 |
| 10               | 7                | 0              | 2.705425                | -0.196820 | 0.469737  |
| 11               | 6                | 0              | 1.476016                | -0.929417 | 0.831116  |
| 12               | 6                | 0              | 1.460008                | -2.328614 | 0.289210  |
| 13               | 6                | 0              | 0.488909                | -2.729097 | -0.641498 |
| 14               | 6                | 0              | 0.555696                | -4.003192 | -1.215711 |
| 15               | 6                | 0              | 1.573193                | -4.879998 | -0.860817 |
| 16               | 6                | 0              | 2.528894                | -4.497513 | 0.077389  |
| 17               | 6                | 0              | 2.465605                | -3.228816 | 0.640696  |
| 18               | 7                | 0              | -0.611590               | -1.896894 | -0.928895 |
| 19               | 6                | 0              | -0.868081               | -1.548388 | -2.133595 |
| 20               | 6                | 0              | -2.131477               | -0.859478 | -2.422090 |
| 21               | 7                | 0              | -3.002080               | -0.877284 | -1.426192 |
| 22               | 6                | 0              | -4.220376               | -0.344577 | -1.534096 |
| 23               | 6                | 0              | -4.655277               | 0.275133  | -2.742190 |
| 24               | 6                | 0              | -3.710380               | 0.307026  | -3.798593 |
| 25               | 6                | 0              | -2.463088               | -0.260494 | -3.654502 |
| 26               | 6                | 0              | -5.965975               | 0.785738  | -2.797496 |
| 27               | 6                | 0              | -6.775776               | 0.651129  | -1.681997 |
| 28               | 6                | 0              | -6.353173               | 0.042426  | -0.488599 |
| 29               | 6                | 0              | -5.058667               | -0.472858 | -0.354500 |
| 30               | 30               | 0              | -2.557606               | -1.543484 | 0.510480  |
| 31               | 8                | 0              | -4.581503               | -1.038165 | 0.704968  |
| 32               | 7                | 0              | -2.070588               | 0.901313  | 0.922278  |
| 33               | 6                | 0              | -1.624194               | 1.067717  | 2.106779  |
| 34               | 6                | 0              | -1.150901               | -0.112584 | 2.843381  |
| 35               | 7                | 0              | -1.490417               | -1.275978 | 2.312178  |
| 36               | 6                | 0              | -1.064738               | -2.437689 | 2.824869  |
| 37               | 6                | 0              | -0.202833               | -2.478912 | 3.960165  |
| 38               | 6                | 0              | 0.132588                | -1.226417 | 4.533462  |
| 39               | 6                | 0              | -0.339699               | -0.050312 | 3.993260  |
| 40               | 6                | 0              | 0.244048                | -3.732222 | 4.420458  |
| 41               | 6                | 0              | -0.177176               | -4.869919 | 3.754068  |
| 42               | 6                | 0              | -1.039594               | -4.838411 | 2.645582  |

|    |    |   |           |           |           |
|----|----|---|-----------|-----------|-----------|
| 43 | 6  | 0 | -1.523790 | -3.629207 | 2.133790  |
| 44 | 8  | 0 | -2.318116 | -3.513712 | 1.120909  |
| 45 | 6  | 0 | -2.594790 | 1.976803  | 0.176266  |
| 46 | 6  | 0 | -1.881975 | 2.499195  | -0.913728 |
| 47 | 6  | 0 | -2.495067 | 3.470991  | -1.705540 |
| 48 | 6  | 0 | -3.773568 | 3.938891  | -1.423648 |
| 49 | 6  | 0 | -4.459873 | 3.429996  | -0.325148 |
| 50 | 6  | 0 | -3.877170 | 2.447494  | 0.466649  |
| 51 | 6  | 0 | -0.456473 | 2.110795  | -1.197216 |
| 52 | 7  | 0 | 0.542220  | 3.141600  | -0.825510 |
| 53 | 16 | 0 | 0.792099  | 3.411192  | 0.807094  |
| 54 | 8  | 0 | 1.244998  | 2.128787  | 1.360784  |
| 55 | 6  | 0 | 2.128199  | 4.563792  | 0.751513  |
| 56 | 6  | 0 | 3.356405  | 4.158984  | 0.231233  |
| 57 | 6  | 0 | 4.404612  | 5.069076  | 0.223444  |
| 58 | 6  | 0 | 4.245526  | 6.363378  | 0.729843  |
| 59 | 6  | 0 | 3.000028  | 6.737291  | 1.244341  |
| 60 | 6  | 0 | 1.936718  | 5.845103  | 1.261739  |
| 61 | 6  | 0 | 5.388233  | 7.331069  | 0.737751  |
| 62 | 8  | 0 | -0.346614 | 4.047296  | 1.474168  |
| 63 | 8  | 0 | 3.926149  | 1.195887  | -1.182146 |
| 64 | 1  | 0 | -1.740304 | -0.252410 | -4.468016 |
| 65 | 1  | 0 | -7.033968 | -0.031787 | 0.358503  |
| 66 | 1  | 0 | -6.326965 | 1.262943  | -3.706897 |
| 67 | 1  | 0 | -3.991382 | 0.776039  | -4.741286 |
| 68 | 1  | 0 | -7.794578 | 1.036724  | -1.726391 |
| 69 | 1  | 0 | -0.078670 | 0.915977  | 4.420365  |
| 70 | 1  | 0 | -1.339236 | -5.765205 | 2.158097  |
| 71 | 1  | 0 | 0.906856  | -3.790442 | 5.282050  |
| 72 | 1  | 0 | 0.777692  | -1.205934 | 5.411560  |
| 73 | 1  | 0 | 0.171124  | -5.841422 | 4.105159  |
| 74 | 1  | 0 | -1.547997 | 2.056620  | 2.579473  |
| 75 | 1  | 0 | -0.187869 | -1.766685 | -2.967986 |
| 76 | 1  | 0 | -0.219610 | -4.304382 | -1.919508 |
| 77 | 1  | 0 | 1.614883  | -5.868595 | -1.314823 |
| 78 | 1  | 0 | 3.225010  | -2.906029 | 1.353897  |
| 79 | 1  | 0 | 3.331192  | -5.178822 | 0.356075  |
| 80 | 1  | 0 | -4.417068 | 2.008596  | 1.304852  |
| 81 | 1  | 0 | -1.947455 | 3.871884  | -2.560836 |
| 82 | 1  | 0 | -5.462975 | 3.782489  | -0.090843 |
| 83 | 1  | 0 | -4.230861 | 4.695993  | -2.057550 |
| 84 | 1  | 0 | 0.578827  | -0.380802 | 0.510408  |
| 85 | 1  | 0 | 1.480301  | -0.938119 | 1.930717  |
| 86 | 1  | 0 | -0.166573 | 1.182201  | -0.694005 |
| 87 | 1  | 0 | -0.300367 | 1.946085  | -2.271213 |
| 88 | 1  | 0 | 2.641450  | -2.055788 | -3.099673 |
| 89 | 1  | 0 | 5.523445  | -0.961824 | -0.098250 |
| 90 | 1  | 0 | 3.986561  | -4.075076 | -3.646898 |
| 91 | 1  | 0 | 6.864745  | -2.973206 | -0.655873 |
| 92 | 1  | 0 | 0.967514  | 6.133115  | 1.662320  |
| 93 | 1  | 0 | 3.491103  | 3.154492  | -0.173686 |

|     |   |   |          |           |           |
|-----|---|---|----------|-----------|-----------|
| 94  | 1 | 0 | 2.864041 | 7.744488  | 1.637453  |
| 95  | 1 | 0 | 5.370113 | 4.771265  | -0.184247 |
| 96  | 1 | 0 | 5.063037 | 8.335570  | 0.440049  |
| 97  | 1 | 0 | 5.818227 | 7.419860  | 1.744955  |
| 98  | 1 | 0 | 6.191030 | 7.013170  | 0.062947  |
| 99  | 1 | 0 | 5.982931 | -5.727106 | -1.796206 |
| 100 | 1 | 0 | 6.126839 | -5.262384 | -3.495500 |
| 101 | 1 | 0 | 7.364346 | -4.759218 | -2.320493 |
| 102 | 1 | 0 | 2.671717 | 0.743178  | 0.879740  |
| 103 | 1 | 0 | 0.350424 | 4.038305  | -1.279103 |

-----

## Zn(HL<sup>ring</sup>)<sub>2</sub>

|                                              |                             |
|----------------------------------------------|-----------------------------|
| Zero-point correction=                       | 0.800202 (Hartree/Particle) |
| Thermal correction to Energy=                | 0.851957                    |
| Thermal correction to Enthalpy=              | 0.852901                    |
| Thermal correction to Gibbs Free Energy=     | 0.716301                    |
| Sum of electronic and zero-point Energies=   | -3492.279991                |
| Sum of electronic and thermal Energies=      | -3492.228236                |
| Sum of electronic and thermal Enthalpies=    | -3492.227292                |
| Sum of electronic and thermal Free Energies= | -3492.363892                |

-----

| Center Number | Atomic Number | Atomic Type | Coordinates (Angstroms) |           |           |
|---------------|---------------|-------------|-------------------------|-----------|-----------|
|               |               |             | X                       | Y         | Z         |
| 1             | 6             | 0           | 4.510493                | -0.974849 | -2.567696 |
| 2             | 6             | 0           | 4.579861                | -1.645693 | -1.346618 |
| 3             | 6             | 0           | 5.268957                | -1.107443 | -0.262491 |
| 4             | 6             | 0           | 5.872378                | 0.136753  | -0.403634 |
| 5             | 6             | 0           | 5.791002                | 0.845013  | -1.605101 |
| 6             | 6             | 0           | 5.117206                | 0.264477  | -2.686638 |
| 7             | 16            | 0           | 3.652550                | -3.135294 | -1.138977 |
| 8             | 8             | 0           | 4.205843                | -3.871134 | -0.008499 |
| 9             | 6             | 0           | 6.397923                | 2.206111  | -1.744736 |
| 10            | 7             | 0           | 2.095055                | -2.694890 | -0.655963 |
| 11            | 6             | 0           | 1.957754                | -2.069127 | 0.649054  |
| 12            | 7             | 0           | 1.910873                | -0.598825 | 0.580091  |
| 13            | 6             | 0           | 1.856195                | 0.040603  | -0.671495 |
| 14            | 6             | 0           | 1.395793                | -0.656868 | -1.797412 |
| 15            | 6             | 0           | 1.180166                | -2.137266 | -1.660239 |
| 16            | 6             | 0           | 2.210225                | 1.388597  | -0.787774 |
| 17            | 6             | 0           | 2.043857                | 2.050015  | -1.997469 |
| 18            | 6             | 0           | 1.542154                | 1.375637  | -3.111880 |
| 19            | 6             | 0           | 1.246717                | 0.020044  | -3.008083 |
| 20            | 6             | 0           | 0.735548                | -2.651340 | 1.346034  |
| 21            | 7             | 0           | -0.065349               | -1.825051 | 1.981050  |

|    |    |   |           |           |           |
|----|----|---|-----------|-----------|-----------|
| 22 | 6  | 0 | -1.137256 | -2.278654 | 2.677537  |
| 23 | 6  | 0 | -1.437066 | -3.664055 | 2.754294  |
| 24 | 6  | 0 | -0.563966 | -4.534537 | 2.056771  |
| 25 | 6  | 0 | 0.514135  | -4.044014 | 1.360487  |
| 26 | 6  | 0 | -1.950650 | -1.273460 | 3.323955  |
| 27 | 6  | 0 | -3.033057 | -1.756577 | 4.066134  |
| 28 | 6  | 0 | -3.320764 | -3.129077 | 4.141703  |
| 29 | 6  | 0 | -2.556763 | -4.085362 | 3.501181  |
| 30 | 30 | 0 | -0.011111 | 0.269447  | 2.023710  |
| 31 | 8  | 0 | -1.654440 | -0.015845 | 3.195072  |
| 32 | 7  | 0 | 0.153539  | 2.250760  | 1.387264  |
| 33 | 6  | 0 | -0.486534 | 2.825100  | 0.397771  |
| 34 | 6  | 0 | -0.323498 | 4.198704  | 0.116610  |
| 35 | 6  | 0 | 0.537714  | 4.934962  | 0.891535  |
| 36 | 6  | 0 | 1.264083  | 4.328510  | 1.947826  |
| 37 | 6  | 0 | 1.030634  | 2.945011  | 2.155685  |
| 38 | 6  | 0 | 2.200489  | 4.995749  | 2.764368  |
| 39 | 6  | 0 | 2.876437  | 4.267994  | 3.724563  |
| 40 | 6  | 0 | 2.670277  | 2.891396  | 3.914916  |
| 41 | 6  | 0 | 1.748863  | 2.174950  | 3.143683  |
| 42 | 6  | 0 | -1.315036 | 1.956434  | -0.532259 |
| 43 | 7  | 0 | -2.631024 | 2.548060  | -0.687464 |
| 44 | 6  | 0 | -3.542545 | 2.187459  | 0.412419  |
| 45 | 6  | 0 | -3.716679 | 0.701262  | 0.459496  |
| 46 | 6  | 0 | -2.610098 | -0.080867 | 0.116403  |
| 47 | 7  | 0 | -1.349780 | 0.536108  | -0.107667 |
| 48 | 6  | 0 | -4.934607 | 0.086901  | 0.734161  |
| 49 | 6  | 0 | -5.064846 | -1.296394 | 0.665940  |
| 50 | 6  | 0 | -3.967164 | -2.067125 | 0.290747  |
| 51 | 6  | 0 | -2.744644 | -1.465951 | 0.017480  |
| 52 | 16 | 0 | -3.240901 | 2.630696  | -2.260070 |
| 53 | 8  | 0 | -4.565895 | 3.223109  | -2.130369 |
| 54 | 8  | 0 | 1.530403  | 0.898057  | 3.248147  |
| 55 | 6  | 0 | -3.398320 | 0.975105  | -2.859090 |
| 56 | 6  | 0 | -2.279820 | 0.343594  | -3.399175 |
| 57 | 6  | 0 | -2.352947 | -1.010100 | -3.701595 |
| 58 | 6  | 0 | -3.528772 | -1.733072 | -3.480838 |
| 59 | 6  | 0 | -4.652465 | -1.059344 | -2.988960 |
| 60 | 6  | 0 | -4.594321 | 0.286749  | -2.663740 |
| 61 | 6  | 0 | -3.584224 | -3.208365 | -3.723069 |
| 62 | 8  | 0 | -2.195776 | 3.290981  | -3.035750 |
| 63 | 8  | 0 | 3.484942  | -3.772963 | -2.438392 |
| 64 | 1  | 0 | 2.554270  | -0.152449 | 1.232110  |
| 65 | 1  | 0 | -0.787790 | -0.020201 | -0.753168 |
| 66 | 1  | 0 | -0.868072 | 4.643936  | -0.713390 |
| 67 | 1  | 0 | 0.686846  | 5.995963  | 0.690963  |
| 68 | 1  | 0 | 2.383630  | 6.059246  | 2.620399  |
| 69 | 1  | 0 | 3.606453  | 4.773141  | 4.356686  |
| 70 | 1  | 0 | 3.237728  | 2.352752  | 4.673122  |
| 71 | 1  | 0 | -0.807322 | 2.007639  | -1.508252 |
| 72 | 1  | 0 | -1.889761 | -2.079177 | -0.277314 |



|     |   |   |           |           |           |
|-----|---|---|-----------|-----------|-----------|
| 73  | 1 | 0 | -4.055683 | -3.150322 | 0.215222  |
| 74  | 1 | 0 | -6.021261 | -1.768272 | 0.881822  |
| 75  | 1 | 0 | -5.793386 | 0.709733  | 0.986855  |
| 76  | 1 | 0 | -1.364503 | 0.905177  | -3.584543 |
| 77  | 1 | 0 | -1.483149 | -1.519111 | -4.117785 |
| 78  | 1 | 0 | -5.579986 | -1.610117 | -2.833096 |
| 79  | 1 | 0 | -5.461121 | 0.799558  | -2.251751 |
| 80  | 1 | 0 | -3.078946 | 2.587139  | 1.329328  |
| 81  | 1 | 0 | -4.492133 | 2.713880  | 0.274818  |
| 82  | 1 | 0 | -3.548674 | -3.749088 | -2.765581 |
| 83  | 1 | 0 | -4.516614 | -3.501823 | -4.220911 |
| 84  | 1 | 0 | -2.741325 | -3.553692 | -4.332055 |
| 85  | 1 | 0 | 1.196731  | -4.701105 | 0.826372  |
| 86  | 1 | 0 | -0.757072 | -5.606936 | 2.083628  |
| 87  | 1 | 0 | -2.794668 | -5.145663 | 3.567954  |
| 88  | 1 | 0 | -4.183566 | -3.444285 | 4.728596  |
| 89  | 1 | 0 | -3.670152 | -1.034181 | 4.575245  |
| 90  | 1 | 0 | 2.834148  | -2.358546 | 1.245853  |
| 91  | 1 | 0 | 2.605625  | 1.916371  | 0.082241  |
| 92  | 1 | 0 | 2.307183  | 3.104209  | -2.067948 |
| 93  | 1 | 0 | 1.413661  | 1.893649  | -4.059975 |
| 94  | 1 | 0 | 0.916819  | -0.539335 | -3.885398 |
| 95  | 1 | 0 | 5.337751  | -1.655876 | 0.675090  |
| 96  | 1 | 0 | 6.414275  | 0.569613  | 0.436389  |
| 97  | 1 | 0 | 5.064729  | 0.800827  | -3.634011 |
| 98  | 1 | 0 | 3.986109  | -1.423312 | -3.409527 |
| 99  | 1 | 0 | 0.160865  | -2.396780 | -1.325252 |
| 100 | 1 | 0 | 1.332470  | -2.661141 | -2.610151 |
| 101 | 1 | 0 | 6.998616  | 2.475572  | -0.869019 |
| 102 | 1 | 0 | 5.615536  | 2.969130  | -1.863400 |
| 103 | 1 | 0 | 7.037936  | 2.267730  | -2.634125 |

---
